1 **Convergent evolution of ventral adaptations for enrollment in trilobites and extant**  
2 **euarthropods**

3

4 Sarah R. Losso\*<sup>1</sup>, Pauline Affatato<sup>1</sup>, Karma Nanglu<sup>1</sup>, & Javier Ortega-Hernández\*<sup>1</sup>

5 <sup>1</sup>Museum of Comparative Zoology and Department of Organismic and Evolutionary Biology,  
6 Harvard University, Cambridge, MA 02138, USA.

7

8 **Keywords:** Walcott Rust, exceptional preservation, Glomeriida, Trilobita, *Limulus*, Isopoda

9

10 **Abstract**

11 The ability to enroll for protection is an effective defensive strategy that has convergently  
12 evolved multiple times in disparate animal groups ranging from euarthropods to mammals.  
13 Enrollment is an evolutionary staple of trilobites, and their biomineralized dorsal exoskeleton  
14 offers a versatile substrate for the evolution of interlocking devices. However, it is unknown  
15 whether trilobites also featured ventral adaptations for enrolment. Here, we report ventral  
16 exoskeletal adaptations that facilitate enrollment in exceptionally preserved trilobites from the  
17 Upper Ordovician Walcott-Rust Quarry in New York State, USA. Walcott-Rust trilobites reveal  
18 the intricate three-dimensional organization of the non-biomineralized ventral anatomy preserved  
19 as calcite casts, including the spatial relationship between the articulated sternites (i.e., ventral  
20 exoskeletal plates) and the wedge-shaped protopodites. Enrollment in trilobites is achieved by  
21 ventrally dipping the anterior margin of the sternites during trunk flexure, facilitated by the  
22 presence of flexible membranes, and the close coupling of the wedge-shaped protopodites.  
23 Comparisons with the ventral morphology of extant glomerid millipedes and terrestrial isopods

24 reveal similar mechanisms used for enrollment. The wedge-shaped protopodites of trilobites  
25 closely resemble the gnathobasic coxa/protopodite of extant horseshoe crabs. We propose that  
26 the trilobites' wedge-shaped protopodite simultaneously facilitates tight enrollment and  
27 gnathobasic feeding with the trunk appendages.

28

## 29 **Introduction**

30 The ability to completely enroll the body to form a tight protective ball to deter predatory attacks  
31 represents an effective strategy that has evolved multiple times throughout bilaterian evolution,  
32 including archetypical examples like xenarthan mammals (Superina and Loughry, 2012) and  
33 several euarthropods such as myriapods (Hannibal and Feldmann, 1981; Shear et al., 2011),  
34 terrestrial isopods (Brökeland et al., 2001; Hyžný and Dávid, 2017), and even some insect  
35 lineages (Ballerio and Grebennikov, 2016). Among extinct species, enrollment has been  
36 thoroughly documented in trilobites, a megadiverse group of marine euarthropods typified by the  
37 presence of a biomineralized calcitic dorsal exoskeleton (Fig. 1). Trilobite evolutionary history  
38 throughout the Paleozoic was heavily influenced by their ability to enroll effectively (e.g., Esteve  
39 et al., 2013; Suárez and Esteve, 2021; Chipman and Drage, 2023). Early Cambrian species show  
40 evidence of complete but imperfect (i.e. no encapsulating) enrollment, leaving open gaps  
41 between the thoracic and pygidial spines (Ortega-Hernández et al., 2013), whereas more derived  
42 groups evolved a diverse array of complex interlocking coaptive devices to make this defensive  
43 strategy more effective (e.g., Esteve et al., 2011, 2017, 2018). Despite its significance for the  
44 long-term evolutionary success of trilobites, enrollment is exclusively known from the  
45 perspective of the dorsal exoskeleton due to the paucity of enrolled specimens with exceptionally  
46 preserved non-biomineralizing ventral structures (Fig. 1). Thus, the precise physical mechanisms

47 by which the ventral surface of trilobites could accommodate their numerous biramous  
48 appendages and other exoskeletal structures during enrollment remains enigmatic. Attempts to  
49 explain how the limbs would be organized relative to each other during enrolment have focused  
50 on hypothetical reconstructions of the non-biomineralized structures, like the exceptionally  
51 preserved Ordovician trilobite *Placoparia cambriensis* (e.g., Whittington, 1993). Although this  
52 reconstruction considered the position of the flexible intersegmental tendinous bars based on  
53 fossil data, it did not account for the presence of sternites (i.e., ventral exoskeletal plates) that are  
54 located in the medial space between each pair of limbs (Whittington, 1993). Moreover, trilobite  
55 appendages are infrequently preserved, being only known from *Konservat-Lagerstätten* such as  
56 the early Cambrian Chengjiang (e.g., Ramsköld and Edgecombe, 1996; Hou et al., 2008), mid-  
57 Cambrian Burgess Shale (e.g., Whittington, 1975; Losso and Ortega-Hernández, 2022), and  
58 Ordovician Beecher's Bed (e.g., Whittington and Almond, 1987; Hou et al., 2021). Trilobite  
59 macrofossils from *Konservat-Lagerstätten* are typically highly compressed and their appendages  
60 are only found in prone specimens, limiting our understanding of the three-dimensional  
61 morphology and organization of the limbs during enrollment. In this context, the precise  
62 morphology of trilobite appendages has also not been comprehensively considered in terms of  
63 how they would fit in a completely enrolled position. The cross-section shape of the trilobite  
64 protopodite, for example, has been illustrated as either oval (Whittington, 1975; Whittington and  
65 Almond, 1987; Bruton and Haas, 1999; Bicknell et al., 2021; Schmidt et al., 2021) or square  
66 (Hou et al., 2021), or authors have omitted them altogether because of the lack of available data -  
67 (Whittington, 1993). While these differences may seem minor, shape plays a critical role in the  
68 function of various body parts (e.g., Bicknell et al. 2021), and thus this represents a fundamental

69 gap of missing data when reconstructing the early autecology and functional morphology of one  
70 of the first successful clades in the evolutionary history of euarthropods.

71 In this study, we describe the non-biomineralized three-dimensional ventral exoskeletal  
72 morphology of trilobites from the Upper Ordovician (Mohawkian) Rust Formation of New York  
73 state based on exceptionally preserved fossils with soft tissues replicated as calcite casts (Losso  
74 et al., 2023). Trilobites from the Walcott-Rust Quarry are preserved in various stages of trunk  
75 flexure, revealing the intricate coupling of the biramous appendages and sternites to maximize a  
76 tight complete enrollment. Comparisons with the three-dimensional exoskeletal and appendicular  
77 morphology of extant euarthropods, including a glomerid millipede, a terrestrial isopod, and the  
78 Atlantic horseshoe crab *Limulus polyphemus*, indicate striking cases of convergent evolution in  
79 terms of their ventral exoskeletal anatomy. The presence of these functionally similar adaptations  
80 in phylogenetically disparate euarthropod lineages demonstrates a profound case of convergent  
81 evolution towards a common method of body enrollment separated by over 500 million years.

82

### 83 **Materials and methods**

84 All studied specimens are housed at the Museum of Comparative Zoology (MCZ) at Harvard  
85 University (Cambridge, Massachusetts, USA). Trilobites from the Walcott-Rust Quarry originate  
86 from the Upper Ordovician Rust Formation, Trenton Group, in New York state. The  
87 exceptionally preserved trilobite fossils are composed of three-dimensional calcite casts of non-  
88 biomineralized tissues in a micritic limestone matrix from Layer 3 of the Rust Formation (see  
89 Losso et al., 2023). The studied trilobites are mounted as thin sections, produced by Charles D.  
90 Walcott in the 1870s (Yochelson, 1998). Fossil specimens were imaged at the Digital Imaging  
91 Facility (DIF) at the MCZ using a Keyence microscope with transmitted light. Extant

92 euarthropod specimens sampled from the Invertebrate Zoology collections at the MCZ were  
93 imaged to analyze their protopodite and sternite morphologies, including *Limulus polyphemus*  
94 (MCZ:IZ:41112), a glomerid millipede (MCZ:IZ:165554) and a terrestrial isopod  
95 (MCZ:IZ:90105). All three specimens were stained with iodine prior to micro-computed  
96 tomographic scanning using a Bruker SkyScan 1173 micro-CT scanner at the DIF. Extant  
97 specimens were stained in iodine to increase resolution of Micro-CT scanning (See Supplemental  
98 Information for detailed staining method). Micro-CT imaging was performed at a voltage of 80  
99 kV, wattage of 100  $\mu$ A, a resolution of 6  $\mu$ m, and with a 0.5 mm thick aluminum filter. Scans  
100 were reconstructed as TIFF stacks in NRecon (Bruker Corporation) and visualized and  
101 segmented in Dragonfly 2019 4.0 (Object Research Systems, Montreal, Canada).

102 One specimen of MCZ:IZ:165554 from the lot of six was dissected and photographed.  
103 Dissections were performed using an Zeiss Stemi 305 microscope under direct light conditions,  
104 and photographs were taken using a Zeiss Axiocam 208 color camera.

105

## 106 **Results**

### 107 **Sternite morphology and preservation**

108 Specimen MCZ:IP:158251, a thin section of the cheirurid trilobite *Ceraurus pleurexanthemus* in  
109 a completely enrolled position (Fig. 2a), reveals the three-dimensional morphology of ventral  
110 exoskeletal structures in exceptional detail. The presence of the hypostome and articulating half  
111 rings on the same specimen indicates that the section follows the sagittal plane along the midline  
112 of the body (Fig. 2a). In addition to showing the pattern of overlap and articulation of the  
113 tergites, MCZ:IP:158251 also preserves non-biomineralized ventral exoskeletal structures bound  
114 by the body wall as delimited by the presence of sparry and fibrous calcite (Losso et al., 2023).

115 MCZ:IP:158251 features five imbricating and serially arranged ventral structures that dip  
116 anteriorly at a 50° angle relative to each other and nearly perpendicular to the dorsal exoskeleton  
117 (Fig. 2b). Unlike the dorsal articulating half rings in the same specimen, the ventral structures do  
118 not directly overlap each other (Fig. 2b) but are continuous between them based on the  
119 distribution of the fibrous calcite. We interpret these ventral features as direct evidence of  
120 sternites in *C. pleurexanthemus*, expressed as the thickened exoskeletal plates, connected on the  
121 anterior and posterior margins by transverse series of flexible tendinous bars (Fig. 2b). Another  
122 specimen of *C. pleurexanthemus* (MCZ:IP:158227) shows a similar sagittal section along the  
123 midline of the body, but here the trunk is only partially enrolled, a position that informs the  
124 position of the ventral structures under a different configuration (Fig. 2c). MCZ:IP:158227 also  
125 preserves five sets of repeating structures, but because of the more abaxial position of the thin  
126 section, as indicated by the protopodites seen posteriorly, the sternites are not visible. The  
127 anterior ventral structures are underneath the slightly enrolled first five tergites and consist of  
128 corrugated bulges with a shorter ventrally concave region between each (Fig. 2c, d). The lesser  
129 degree of trunk flexure in MCZ:IP:158227 shows that the sternites would be parallel relative to  
130 the dorsal exoskeleton in a fully prone position (Fig. 2c, d).

131 Comparisons with 3D datasets of partially and completely enrolled isopods and  
132 millipedes supports the interpretation of the ventral morphology of *Ceraurus pleurexanthemus* as  
133 all taxa display the same pattern of anterior imbrication of sternites during enrollment despite  
134 their different morphologies (Figs. 2, 3). The terrestrial isopod displays a more complex sternite  
135 morphology than trilobites, with a row of paired rectangular plates (Fig. 3a – c) rather than the  
136 single row of hourglass shaped sternites (Whittington, 1993; Ortega-Hernández and Brena,  
137 2012). The anterior edge of the isopod sternite dips ventrally during enrollment below the

138 posterior margin of the preceding plate (Figs. 2e, f, 3c). Glomerid millipedes have wish-bone-  
139 shaped sternites (Fig. 3d – f) with limbs emerging from protopodite/coxa cavities between  
140 adjacent ventral plates (Fig. 3f). The elongate lateral portions of each sternite align with the  
141 adjacent pleurites (Fig. 3e; Supplemental Fig. 1) and imbricate anteriorly during enrollment (Fig.  
142 3f).

143

#### 144 **Protopodite morphology and preservation**

145 Exsagittal thin sections of Walcott-Rust trilobites such as MCZ:IP:158240 (*Ceraurus*  
146 *pleurexanthemus*; Fig. 4a, b) and MCZ:IP:104956 (*Flexicalymene senaria*; Fig. 4c, d) show the  
147 lateral ventral morphology in three-dimensions with exceptional detail. The hypostome and  
148 articulating half rings of the tergites are visible in these specimens, similarly to the sagittal thin  
149 section in MCZ:IP:158251 (Fig. 2a), but the posterior projections of the hypostome indicates that  
150 the more abaxial position near the lateral margin of the axial lobe (Fig. 4a, c). In both  
151 MCZ:IP:158240 and MCZ:IP:104956, a series of serially repeating wedge-shaped ventral  
152 structures are associated with each of the tergites (Figs. 4a, 5c, d). The presence of fibrous calcite  
153 defining these structures indicates that they were originally non-biomineralized (Losso et al.,  
154 2023). The wedge-shaped ventral structures are widest dorsally and taper ventrally to a point at a  
155 40-50° angle (Fig. 4b, d). Specimen MCZ:IP:104956 of *F. senaria* displays a series of 22 wedge-  
156 shaped structures, four of which are associated with the cephalon, but none are visible beneath  
157 the pygidium (Fig. 4c). MCZ:IP:104956 is 65% enrolled and the series of wedge-shaped  
158 structures are angled slightly anteriorly (Fig. 4c). The anterior most wedges have a straight  
159 anterior margin that gently curves anteriorly at their mid-section (Fig. 4d). The posterior margin  
160 of the wedge is similarly curved, which allows for the succeeding wedges to fit snugly against

161 one another when in direct contact (Fig. 4d). The terminal tip of the wedge is slightly enlarged  
162 and bulbous (Fig. 4d).

163         Based on their taphonomy and morphology, we interpret the serially repeating wedge-  
164 shaped structures observed in both *C. pleurexanthemus* and *F. senaria* as direct evidence of  
165 three-dimensionally preserved protopodites, namely the part of the arthropodized biramous  
166 appendage that is in direct contact with the body wall (Boxshall, 2004), as observed in a cross-  
167 sectional view from an exsagittal plane. This interpretation is supported by the precise  
168 association of a wedge with each tergite (Fig. 4c) and the abaxial position relative to the axial  
169 lobe of the dorsal exoskeleton which can also be seen in a transverse thin section of *C.*  
170 *pleurexanthemus* showing an anterior view of the proximal portion of the appendage (Fig. 5a).

171         The repeating wedge-shaped structures are not part of the biomineralized dorsal  
172 exoskeleton, such as muscle attachment sites or apodemes (Whittington et al., 1997; Edgecombe  
173 and Sherwin, 2001; Siveter et al., 2021) as the original calcite would be clearly visible similar to  
174 the tergites and sternites (Fig. 2b, c). Comparisons with additional thin section specimens of *C.*  
175 *pleurexanthemus* further strengthen the interpretation of the wedges as protopodites. Specimen  
176 MCZ:IP:110933 shows a clear and unobstructed view of one biramous appendage (Fig. 5a),  
177 which shows that the laterally splayed protopodites of *C. pleurexanthemus* are subtriangular in  
178 anterior view with a nearly vertical medial margin and horizontal ventral margin. The medial  
179 margin is studded with gnathobasic spines, and the ventral edge is marked by elongate endites  
180 (Fig. 5a). The exopodite is visible dorsally and the endopodite extends from the distal margin of  
181 the protopodite (Fig. 5a). The protopodite of MCZ:IP:110933 extends from the lateral edge of  
182 the dorsal exoskeleton's axial lobe and partially into the pleural lobe, which closely correlate  
183 with the position of the wedge-shaped structures seen in exsagittal thin sections (Fig. 4a, c). One



184 specimen (MCZ:IP:110918) of *Flexicalymene senaria* sectioned in coronal view shows a series  
185 of wedge-shaped structures whose apex points towards the midline of the body (Fig. 5c, d). The  
186 position within the body and the comparison with the two other views (Fig. 4c, d), support the  
187 interpretation of these structures also represent the protopodites as observed from a dorsal  
188 section, which further confirms their wedge-shaped three-dimensional organization.

189 Comparisons with the 3D morphology of *Limulus polyphemus* supports the interpretation  
190 of the ventral structures seen in *Ceraurus pleurexanthemus* and *Flexicalymene senaria* as  
191 exsagittal and coronal views of protopodites based on the wedge-shaped morphology of the  
192 coxa/protopodite (Fig. 4e, f). The coxa/protopodite of the walking legs in *L. polyphemus* are  
193 dorsoventrally elongate with a large area of attachment to the body wall, the dorsal edge is broad  
194 cross section decreasing in width ventrally (Fig. 4e, f). In cross section from an exsagittal view,  
195 the coxae/protopodite are broadest dorsally, tapering ventrally (Fig. 4g, h). The  
196 coxae/protopodite are also wedge-shaped in coronal view, narrowest near the body wall and  
197 widening distally (Fig. 5e, f), a condition that is also seen in *Flexicalymene senaria* (Fig. 5c, d).

198

## 199 **Discussion**

200 Walcott-Rust trilobites reveal new insights into the ventral morphology of trilobites, with direct  
201 implications for understanding their adaptations for enrollment. A single row of hour-glass  
202 shaped sternites are known throughout Trilobitomorpha such as *Arthroaspis bergstroemi* (Stein  
203 et al., 2013), *Misszhouia longicaudata* (Zhang et al., 2007; Mayers et al., 2019), and *Sinoburius*  
204 *lunaris* (Chen et al., 2019). The pyritized olenid trilobite *Triarthrus eatoni* preserves appendages,  
205 sternites and tendinous bars (Whittington and Almond, 1987), which closely resemble those  
206 found in the pliomerid *Placoparia cambriensis* (Whittington, 1993). These examples of

207 preserved sternites are only observable in either ventral or dorsal view due to their preservation  
208 in compacted body fossils, therefore not providing information about the three-dimensional  
209 morphology, position within the body or movement during enrollment. The Walcott-Rust  
210 specimens provide complementary views of the sternites and protopodites that allow to  
211 reconstruct their three-dimensional overall morphology.

212

### 213 **Sternite position during enrollment**

214 All known cases of sternite preservation in trilobites and non-biomineralized trilobitomorphs  
215 point towards the same broad pattern of morphological organization, in which the sternites are  
216 successively arranged in an axial row that runs parallel to the dorsal exoskeleton, and which are  
217 separated by flexible tendinous bars (Fig. 2c, d) (Whittington, 1993; Zhang et al., 2007; Stein et  
218 al., 2013; Mayers et al., 2019; Chen et al., 2019). The sternites are cuticular and have a thinner  
219 constitution than the dorsal exoskeleton; however, the ventral side of the body would not be able  
220 to physically accommodate the entire sternite series during complete enrollment while  
221 maintaining their outstretched disposition without producing excessive tension on either the  
222 ventral side, due to over compression, or the dorsal side, due to over extension (Fig. 5f). Instead,  
223 the ventral data from Walcott-Rust trilobites demonstrate that the sternites and tendinous bars  
224 become corrugated in the transition between prone position to partial and complete enrollment  
225 (Fig. 2a, b), with the anterior edge of the sternite angling ventrally and the flexible tendinous bar  
226 bulging (Fig. 6a-d). Critically, the same configuration between the sternites and arthrodistal  
227 membranes are also observed in isopods (Fig. 3a – c) and millipedes (Fig. 3d – f), with the  
228 anterior edge of the sternites dipping ventrally to accommodate tight and complete enrollment.  
229 These comparisons indicate that despite the distant phylogenetic relationships between trilobites

230 (extinct stem-group chelicerates), isopods (extant crustaceans) and millipedes (extant  
231 myriapods), these euarthropods share fundamentally similar exoskeletal ventral adaptations that  
232 facilitate protective enrollment. These findings evidence a striking case of convergent evolution  
233 that is heavily influenced by the mechanical requirements and limitations necessary to achieve  
234 complete encapsulations in euarthropods, which have been extensively investigated in terms of  
235 their dorsal exoskeletal morphology (e.g., Esteve et al., 2011, 2017, 2018; Chipman and Drage,  
236 2023), but never from the perspective of the ventral anatomy until now. Repeated convergent  
237 evolution of the same mechanism in three distantly related euarthropods demonstrates the  
238 constraints of achieving complete enrollment with a rigid exoskeleton, and simultaneously the  
239 evolutionary advantages that this strategy must confer. Even more notably sternite morphology  
240 varies between the three taxa, from a single row of hourglass-shaped plates in trilobites (Fig. 2a),  
241 paired rectangular plates in isopods (Fig. 3c), to wish-bone-shaped sternites in glomerids (Fig.  
242 3f), yet all species enroll utilizing the same basic mechanism.

243

#### 244 **Functional implications for trilobite musculature during enrollment**

245 The new insights into the ventral exoskeletal organization of the trilobite exoskeleton have direct  
246 implications for understanding the functional morphology of the trunk musculature during  
247 enrollment (Fig. 6). Three proposed dorsal-ventral muscles would attach from tergites to sternites  
248 based on crustacean analogs; the anteriorly descending muscle, the vertically descending muscle  
249 and the posteriorly descending muscle (Cisne, 1981; Whittington, 1993). Longitudinal ventral  
250 muscles have been proposed to be on either side of the body of trilobites, attaching to the  
251 tendinous bar (Beecher, 1902; Størmer, 1939; Hupe, 1953; Whittington, 1993). The  
252 reconstruction of an exceptionally preserved specimen of *Placoparia cambriensis* with soft

253 tissues in sagittal cross section (Whittington, 1993) bears striking similarities to MCZ:IP:158227  
254 which is not fully enrolled (Fig. 2c). However, the fully enrolled reconstruction illustrates the  
255 ventral anatomy exactly the same as in the prone position (Whittington, 1993) despite the  
256 Walcott-Rust trilobites and MCZ:IP:158251 having been published nearly 100 years before with  
257 the corrugated ventral structures highlighted (Walcott 1881). A proposed mechanism of  
258 enrollment and extension for trilobites relied on the contraction of the longitudinal ventral  
259 muscle would bring the sternites closer together, enrolling of the body versus contraction of the  
260 dorsal longitudinal muscle that would extend the body to a prone position (Whittington, 1993)  
261 (Fig 6).

262         In extant euarthropods that completely enroll their body similarly to trilobites, such as  
263 glomeriid millipedes and terrestrial isopods, contraction of the longitudinal ventral muscle flex  
264 the body ventrally (Manton, 1961). However, the sternites are too long (sag.) to allow complete  
265 enrollment without substantial overlap between them (Fig. 3c, f). In this context, the sagittal thin  
266 section of *C. pleurexanthemus* (MCZ:IP: 158251) demonstrates that trilobite enrollment was  
267 accomplished by ventrally dipping the anterior margin of the sternites, producing a corrugated  
268 outline of sternites and arthrodistal membrane (Fig. 3c, f). Based on their basic functional  
269 morphology, euarthropod enrollment is achieved through contraction of the longitudinal ventral  
270 muscle and the vertically descending muscle, bringing sternites closer together and raising the  
271 posterior margin dorsally (Fig. 6b, c). Returning to the prone position is accomplished through  
272 contraction of the longitudinal dorsal muscle and anteriorly descending muscle, which brings the  
273 tergites closer together and raises the anterior margin of the sternite to a horizontal position (Fig.  
274 6d).

275

## 276 **Functional implications of wedge-shaped protopodites**

277 The overall morphological organization of the trilobite protopodite has been elusive because of  
278 its non-biomineralized nature and proximity to the midline, with three-dimensional structure  
279 being especially difficult to reconstruct because of a lack of suitable trilobite fossils that clearly  
280 show this structure (Whittington, 1975; Zeng et al., 2017; Holmes et al., 2020; Bicknell et al.,  
281 2021; Hou et al., 2021; Siveter et al., 2021). This has left a gap in our understanding of  
282 locomotion, enrollment, and feeding autecology because of the crucial role of the protopodite  
283 (Bruton and Haas, 1999; Ortega-Hernández and Brena, 2012; Bicknell et al., 2018, 2021).  
284 Appendages are most frequently preserved in highly compressed anterior or posterior views such  
285 as *Olenoides serratus* from the Burgess Shale (Whittington, 1975; Hou et al., 2021), *Redlichia*  
286 *rex* (Holmes et al., 2020) from Emu Bay, or *Hongshiyanaspis yiliangensis* (Zeng et al., 2017).  
287 The lack of detailed information regarding the cross section of the trilobite protopodite has  
288 resulted a variety of hypothetical morphological interpretations. For instance, the cross section  
289 the trilobite protopodite has been reconstructed as having disparate shapes, including oval (e.g.  
290 Whittington, 1975; Whittington and Almond, 1987; Bruton and Haas, 1999; Ortega-Hernández  
291 and Brena, 2012; Bicknell et al., 2021; Schmidt et al., 2021), square (Hou et al., 2021), or this  
292 aspect has been omitted them altogether because of the lack of available data (Whittington,  
293 1993).

294 Wedge-shaped protopodites may be common across Trilobita and even more broadly  
295 within euarthropods. Specimens of *Isotelus* (DeKay, 1824) are preserved with ventral views of  
296 three-dimensional protopodites (Mickleborough, 1883; Raymond, 1920) which appear as thin  
297 transverse to anterolateral bars, a similar condition to that seen in *Triarthrus eatoni* (Hall, 1838)  
298 (Whittington and Almond, 1987). Wedge-shaped protopodites can explain this view, as the

299 *Isotelus* specimens show a coronal cross section similar to *Flexicalymene senaria*  
300 MCZ:IP:110918 (Fig. 4C). The thin and elongate appears of protopodites in *Isotelus* and *T.*  
301 *eatoni* is the result of the coronal view through the ventral edge or middle of the structure  
302 resulting in a superficially noodle like appearance. The Silurian trilobite *Dalmanites* sp. from the  
303 Herefordshire Biota is preserved as three-dimensional calcite casts visualized through serial  
304 sectioning (Siveter et al., 2021) similar to the preservation seen in the Walcott-Rust fossils  
305 (Losso et al., 2023). This allows segmentation of individual appendages which display wedge-  
306 shaped protopodites resembling those of *Flexicalymene senaria* and *Ceraurus pleurexanthemus*  
307 (Fig. 4a-d). Wedge-shaped protopodites are also found in other trilobitomorphs, such as  
308 xandarellids based on a specimen preserved as a three-dimensional external mold in displaying a  
309 coronal view of the appendages which plunge into the matrix (Ortega-Hernández et al., 2017).  
310 The protopodites appear elongate and slender, similar to *Isotelus* and *T. eatoni* discussed above.  
311 Given the similar orientation to those specimens, the wedge-shaped protopodite morphology can  
312 also account for this specimen with only a 2D view of the structures being visible from the  
313 surface. An exception to this appears to be *Agnostus pisiformis* (Linnaeus, 1747) which has an  
314 oval coronal cross section (Müller and Walossek, 1987), but determining protopodite cross  
315 section from the published literature is difficult because the required views are rarely illustrated  
316 for extant species and rarely preserved in fossil specimens.

317         The widely reproduced oval cross section for the protopodite (Whittington, 1975;  
318 Whittington and Almond, 1987; Bruton and Haas, 1999; Ortega-Hernández and Brena, 2012;  
319 Bicknell et al., 2021; Schmidt et al., 2022) would severely hamper the ability of trilobites enroll  
320 effectively. The oval protopodite would make it impossible for trilobites to achieve complete  
321 enrollment under the normal observed range of motion of the tergites (Fig. 6E), or alternatively,

322 would require the dorsal side of the body to overextend significantly, leaving open gaps between  
323 the articulating tergites and exposing the delicate arthroal membrane to predators (Fig. 6F). In  
324 this context, the distinctively wedge-shaped protopodites of *Flexicalymene senaria* and *Ceraurus*  
325 *pleurexanthemus* (Fig. 3A – D) would play a critical role during enrollment by facilitating a tight  
326 body flexure, but without causing dorsal over extension thanks to their narrow ventral margin  
327 and form-fitting shape relative to each other (Fig. 6G). Comparisons with the three-dimensional  
328 appendage morphology of glomerid millipedes and terrestrial isopods indicate that these extant  
329 taxa do not have a wedge-shaped protopodite but differ from trilobites in having medially-  
330 (Supplemental Figs. 1, 2a – c) or laterally- (Supplemental Fig. 2d – f) attached appendages as  
331 opposed to intermediate condition as in trilobites (Fig. 4a) and other extinct trilobitiforms. A  
332 critical difference between these extant taxa and trilobites, however, is the fact that the former do  
333 not utilize the trunk appendages for food processing, but instead employ the modified mandibles  
334 as mouthparts (Köihler and Alberti, 1990), whereas the entire limb series of trilobites has an  
335 active role in feeding based on the presence of well-developed gnathobasic spines along the food  
336 groove (Hegna, 2009; Bicknell et al., 2021). By contrast, the three-dimensional morphology of  
337 the trilobite protopodite is more similar to that of *Limulus polyphemus* both in terms of its  
338 transverse and dorsal sections (Fig. 3E-H; Fig. 4F, G), which does engage in aquatic gnathobasic  
339 feeding with the entire prosomal limb series (Bicknell et al., 2018, 2021). Based on these  
340 comparisons, we propose that the wedge shape of the trilobite protopodite reflects a unique  
341 functional tradeoff between the physical constraints required for tightly accommodating the  
342 appendages during complete enrollment (Fig. 6G), coupled with their pivotal role in food  
343 processing during gnathobasic feeding through the ventral groove of the body.

344           The ability of trilobites to enroll for protection represents an iconic adaptation that  
345 heavily influenced the long and successful evolutionary history of these extinct euarthropods.  
346 Our new data from the Walcott-Rust Quarry reveal for the first time that, in addition to the  
347 coaptative devices on the dorsal calcitic exoskeleton, trilobites also featured ventral  
348 morphological adaptations of the non-biomineralized sternites and biramous appendages that  
349 played a critical and multifaceted role in their mode of life. We find direct evidence that the  
350 fundamental mechanism of sternite corrugation that facilitate complete enrolment in trilobites is  
351 also expressed in extant glomerid millipedes and terrestrial isopods, showing a striking case of  
352 convergent evolution in phylogenetically distant euarthropod clades separated by hundreds of  
353 millions of years.

354

355 **Figures**

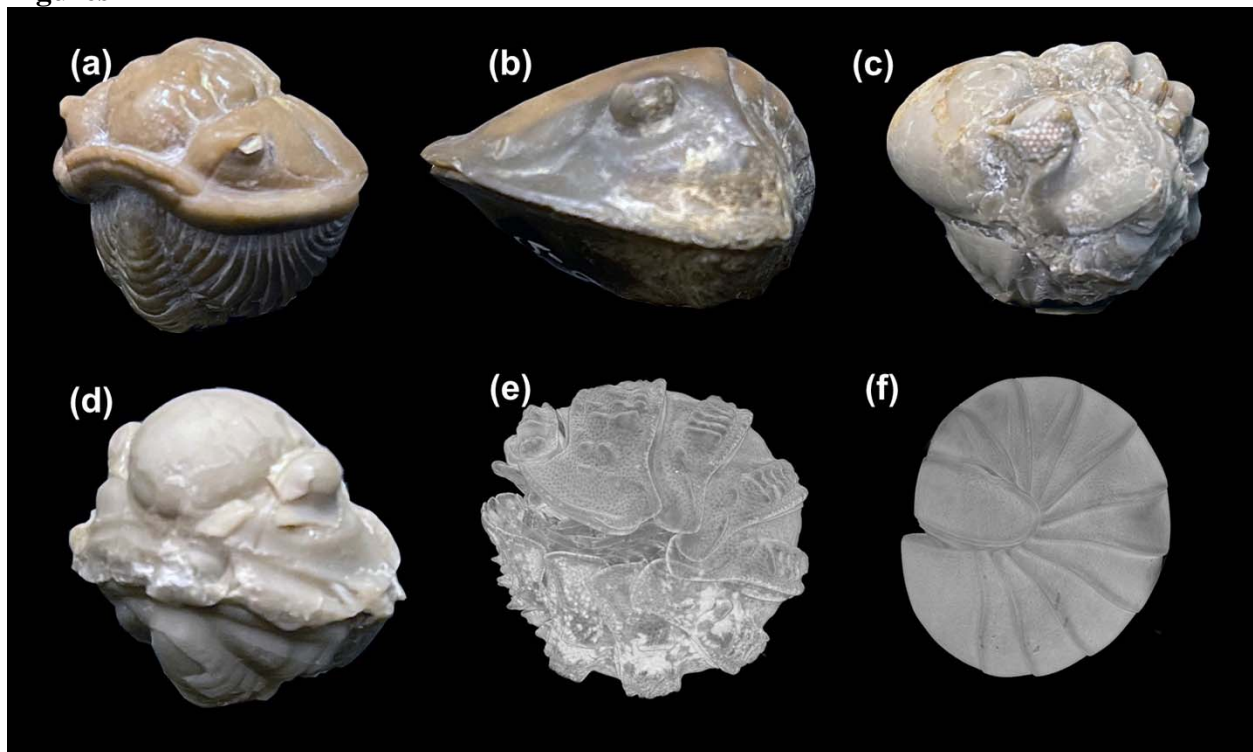

356

357 **Figure 1. Protective enrollment in trilobites and extant euarthropods.** (a) *Calymene fayettens*  
358 (MCZ:IP:5112). (b) *Isotelus maximus* (MCZ:IP:58). (c) *Phacops foecundus* (MCZ:IP:201074).



359 (d) *Proetus bohemicus* (MCZ:IP:5264). (e) Terrestrial isopod (MCZ:IZ:90105). (f) Glomerid  
360 millipede (MCZ:IZ:165554).  
361

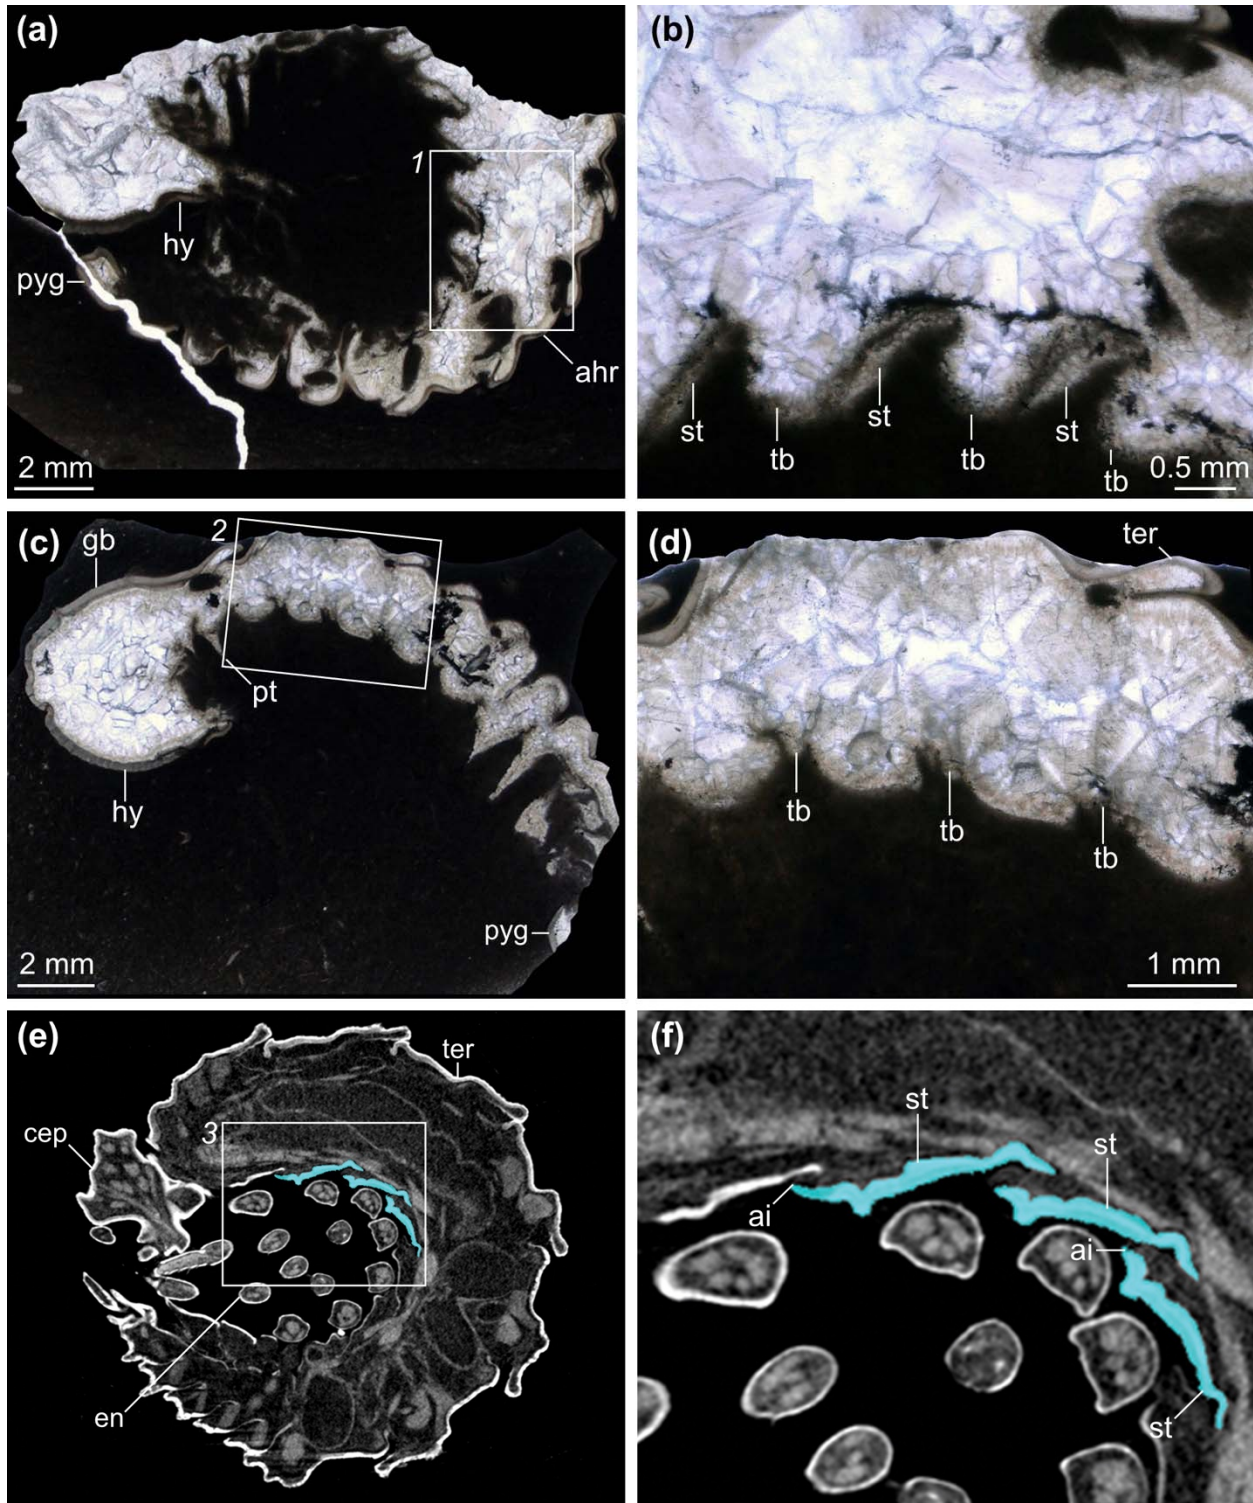

362  
363 **Figure 2. Comparison of sternites and tenuous bars in *Ceraurus pleurexanthemus* and**  
364 **terrestrial isopod in lateral exsagittal section. (a) Photomicrograph of MCZ:IP:158251, a**  
365 **sagittal thin section of a nearly completely enrolled specimen with preserved sternites and**

366 tendinous bars. (b) Photomicrograph of MCZ:IP:158251 showing magnification of sternites box  
367 1 of (a). (c) Photomicrograph of MCZ:IP:158227, a sagittal thin section showing tendinous bars  
368 in partial enrollment. (d) Photomicrograph of MCZ:IP:158227 showing magnification of  
369 tendinous bars box 2 of (c). (e) Tomographic slice of isopod MCZ:IZ:90105 showing corrugation  
370 of sternites (blue highlight). (f) Magnification of sternites (MCZ:IP:90105). Abbreviations: ahr,  
371 articulating half ring; cep, cephalon; en, endopodite; gb, glabella; hy, hypostome; pyg, pygidium;  
372 st, sternite; tb, tenuous bar.  
373

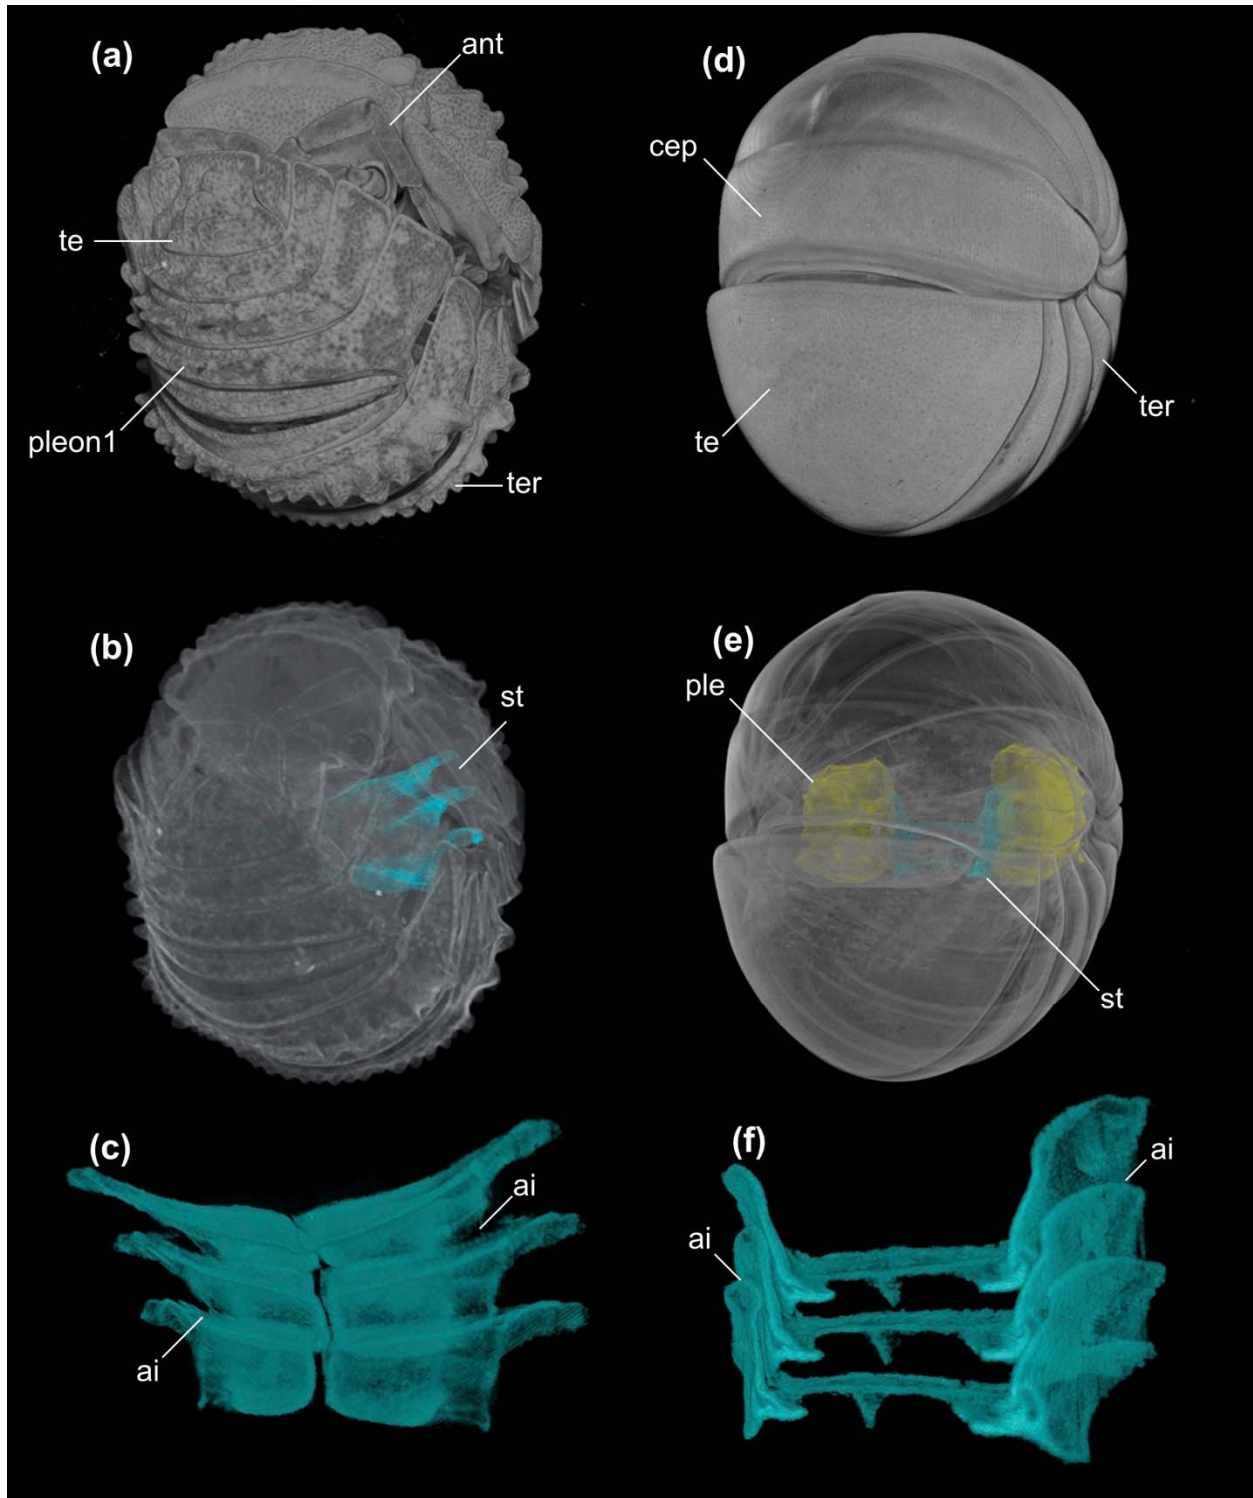

374  
375 **Figure 3. Sternite organization during enrolment in terrestrial isopods and glomerid**  
376 **millipedes.** (a – d) Micro-CT scan of terrestrial isopod MCZ:IZ:90105. (a) Reconstruction of  
377 90% enrolled specimen. (b) Micro-CT of full specimen with three segmented sternites (blue  
378 highlight). (c) Micro-CT segmented sternites from three segments. (d – f) Micro-CT scan of  
379 glomerid millipede MCZ:IZ: 165554. (d) Reconstruction of completely enrolled specimen. (e)  
380 Reconstruction of full specimen with three segmented sternites (blue highlight) and pleurites

381 (yellow highlight). (f) Micro-CT segmented sternites from three segments. Abbreviations: ai,  
382 anterior imbrication; ant, antenna; cep, cephalon; ple, pleurite; st, sternites; te, telson; ter, tergite.  
383

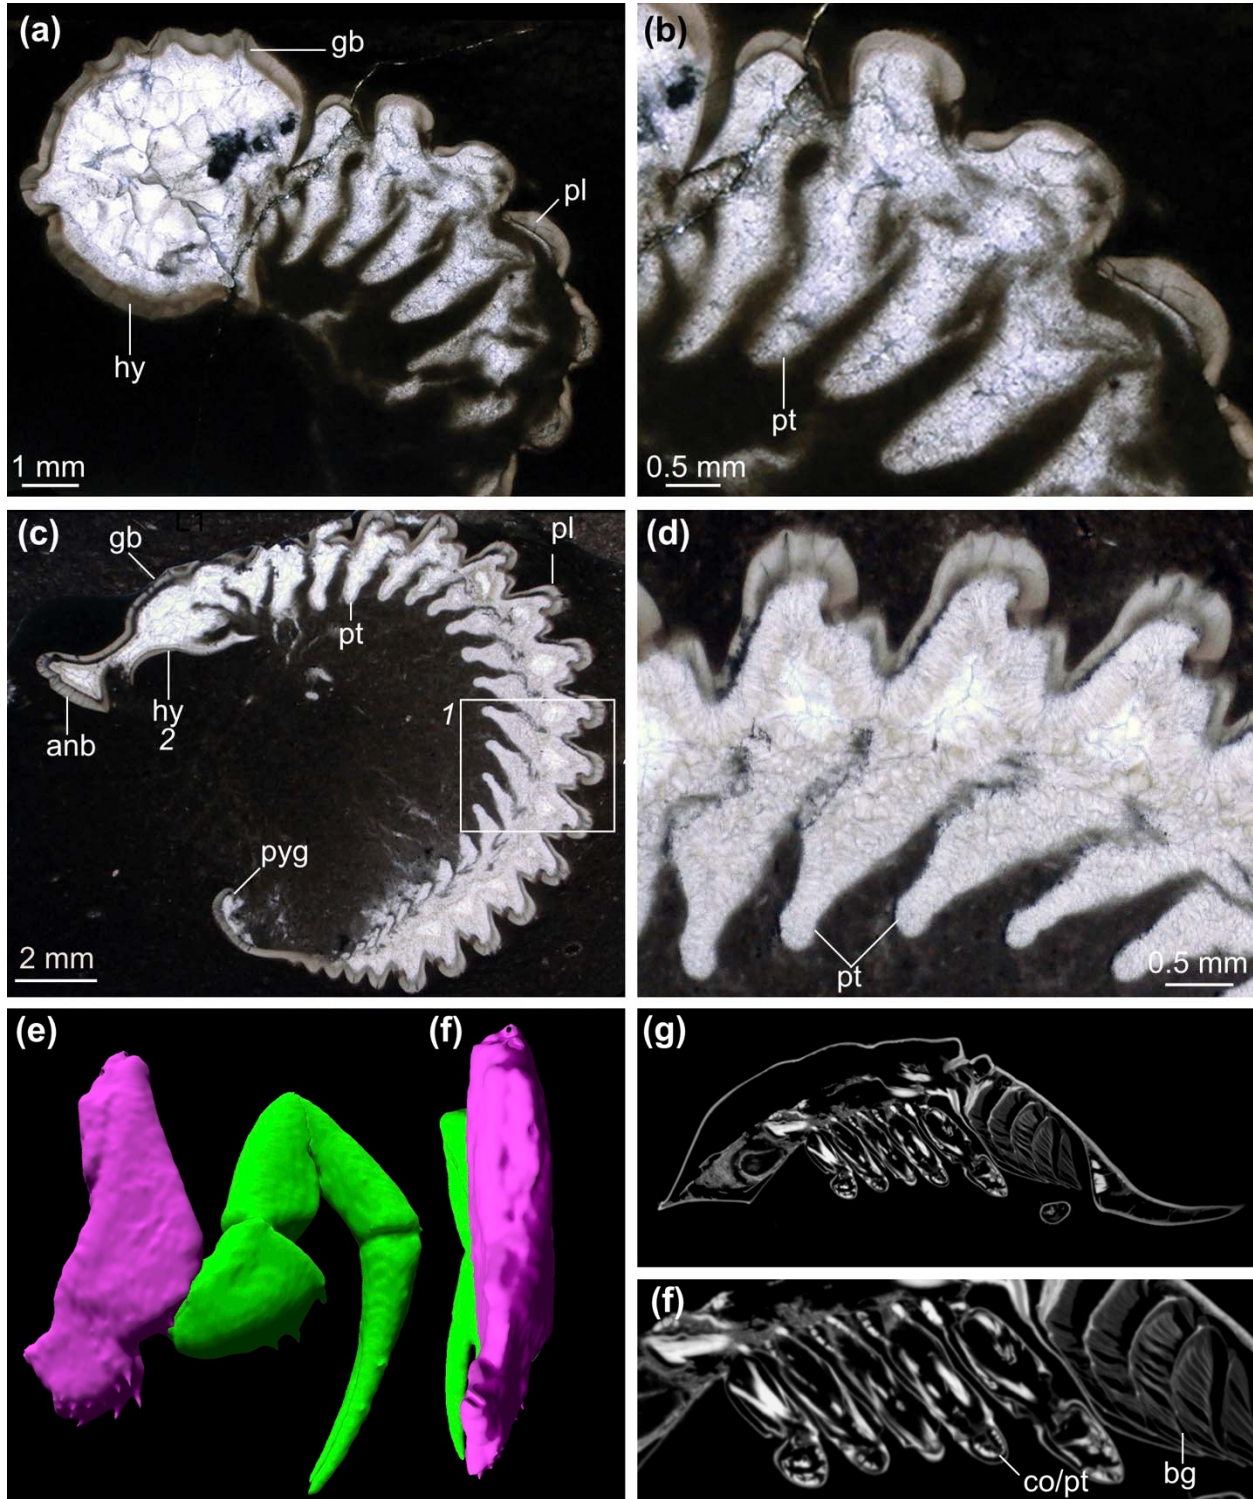

384  
385 **Figure 4. Comparison of coxa/protopodite morphology in Walcott Rust trilobites and**  
386 ***Limulus polyphemus* in lateral section.** (a) Photomicrograph of *Ceraurus pleurexanthemus*, an  
387 exsagittal thin section of showing protopodites in cross section from a lateral view

388 (MCZ:IP:158240). (b) Magnification of protopodites. (c) Photomicrograph of *Flexycalymene*  
389 *senaria*, a transverse thin section of showing protopodites in dorsal view (MCZ:IP:110918). (d)  
390 Magnification of protopodites in box 1 of (c). (e) Micro-CT segmentation of *Limulus*  
391 *polyphemus* (MCZ:IZ: 41112) showing anterior view of walking leg two including  
392 coxa/protopodite (purple highlight) and endopodite (green highlight). (f) Micro-CT segmentation  
393 of *Limulus polyphemus* (MCZ:IZ: 41112) showing medial view of walking leg two. (g)  
394 Tomographic slice of *Limulus polyphemus* (MCZ:IZ: 41112) in exsagittal view showing lateral  
395 section of protopodite. (h) Magnification of coxa/protopodite in lateral section. Abbreviations:  
396 anb, anterior band of cranium; co, coxa; gb, glabella; hy, hypostome; pl, pleural lobe; pt,  
397 protopodite; pyg, pygidium.  
398

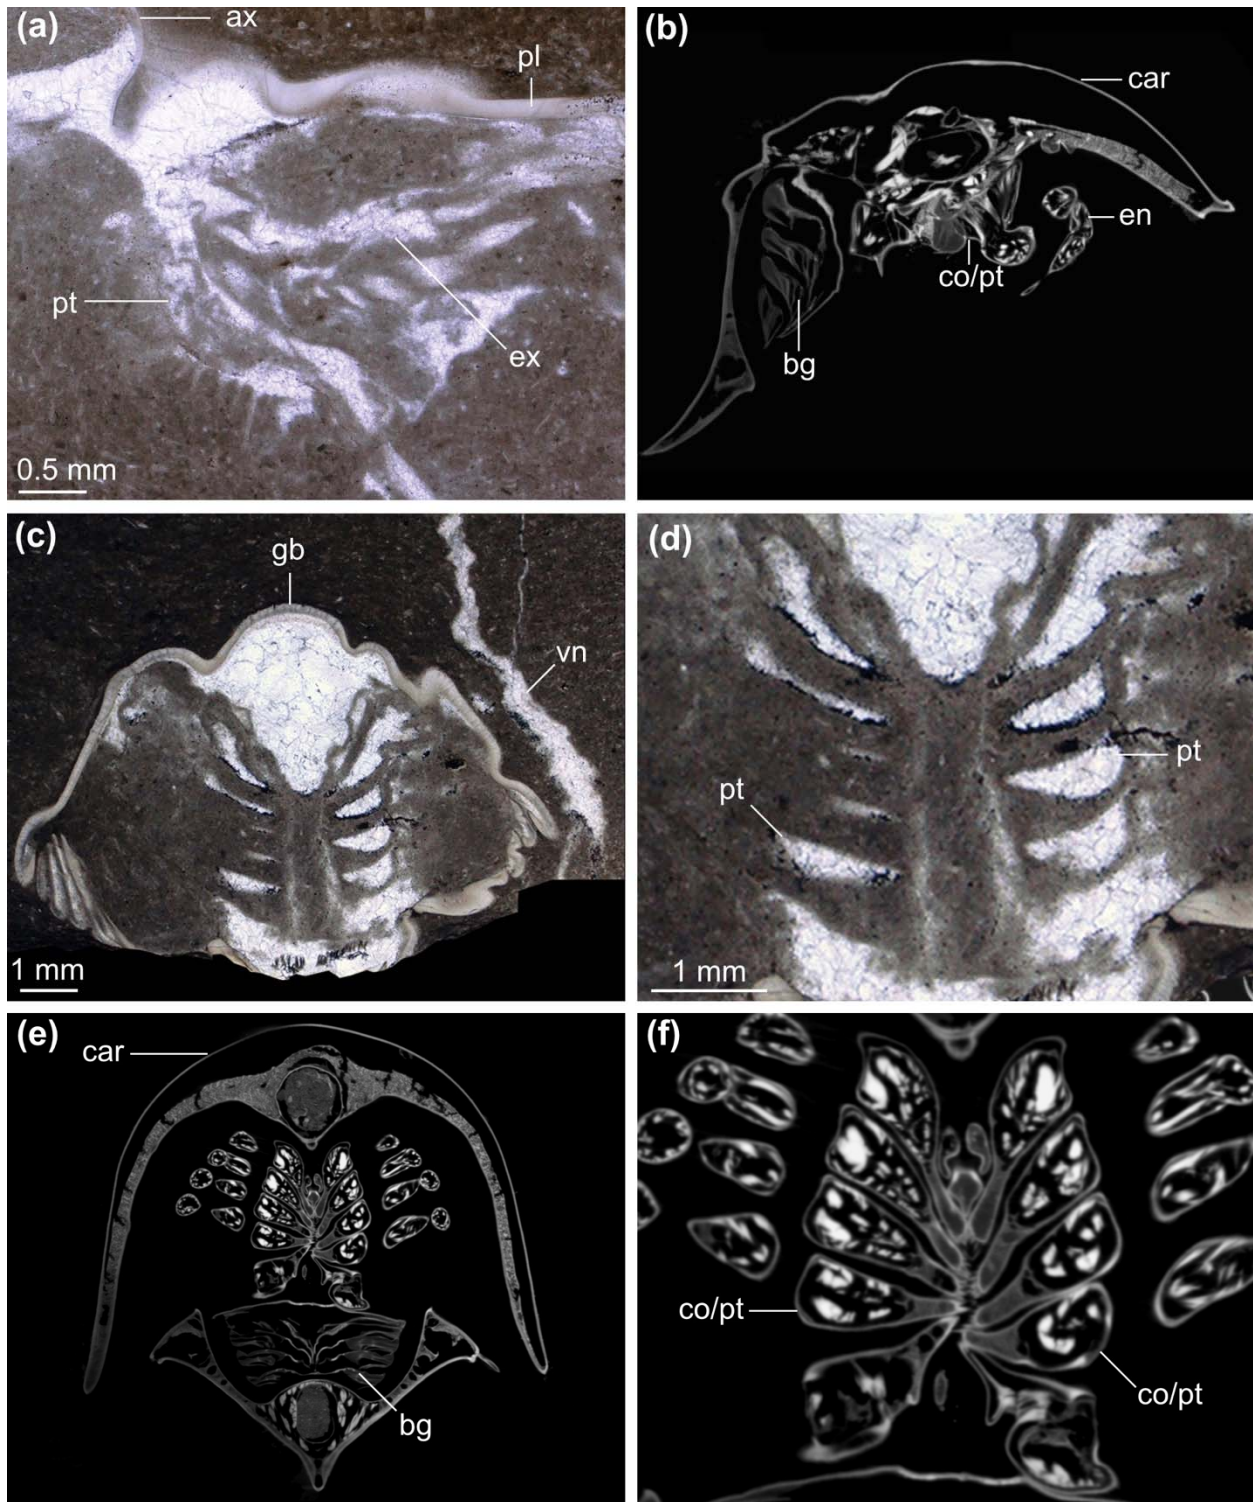

399  
400 **Figure 5. Comparison of coxa/protopodite morphology in Walcott-Rust trilobites and**  
401 ***Limulus polyphemus* in anterior and coronal sections.** (a) Photomicrograph of *Ceraurus*  
402 *pleurexanthemus*, a transverse thin section of showing an anterior-posterior view of the  
403 protopodite (MCZ:IP:110933). (b) Tomographic slice of *Limulus polyphemus* (MCZ:IZ:41112)  
404 showing anterior view of coxa/protopodite. (c) Photomicrograph of *Flexicalymene senaria*, a  
405 transverse thin section showing coronal view of four protopodites (MCZ:IP:110918). (d)

406 Magnification of protopodites of MCZ:IP:110918. (e) Tomographic slice of *Limulus polyphemus*  
 407 (MCZ:IZ: 41112) showing coronal view of coxae/protopodites. (f), Magnification of coxae of  
 408 MCZ:IZ:41112. Abbreviations: ax, axial lobe; car, carapace; co/pt, coxa/protopodite; bg, book  
 409 gill; ex, exopodite; gb, glabella; pl, pleural lobe; pt, protopodite; vn, calcite vein.

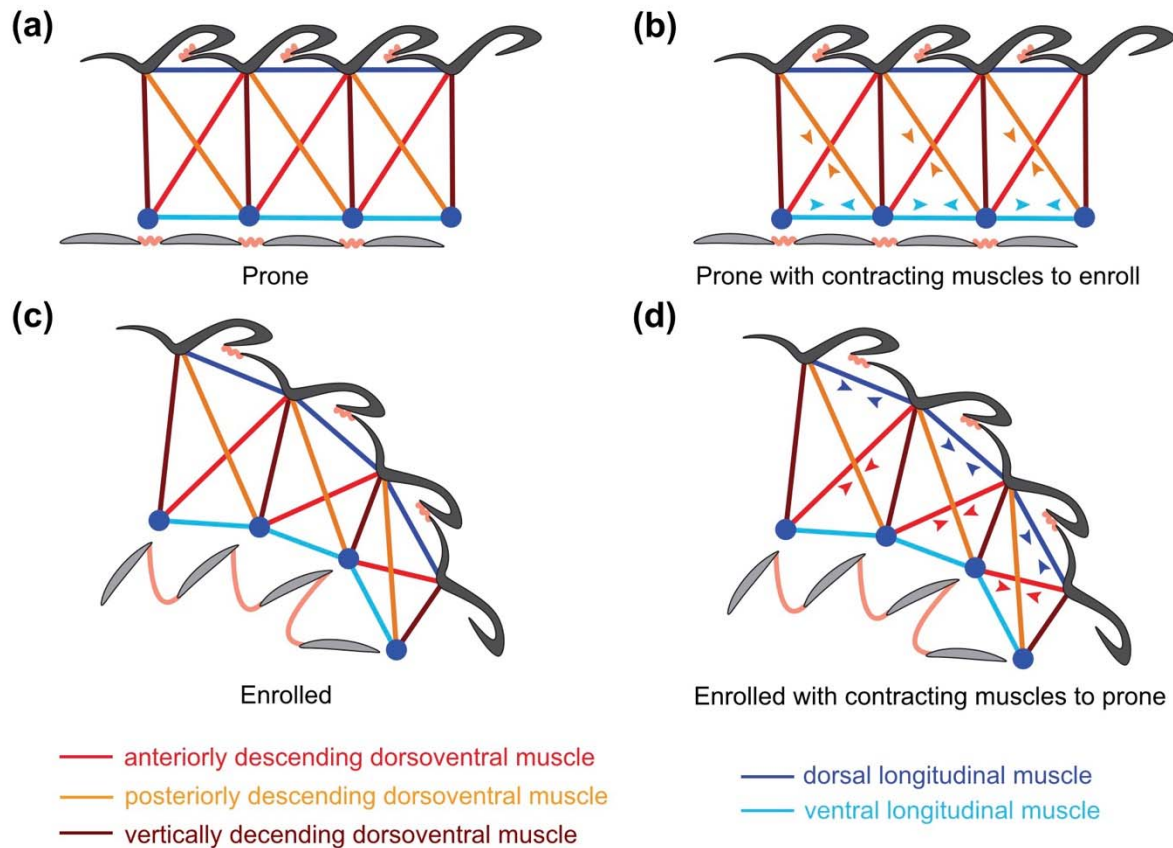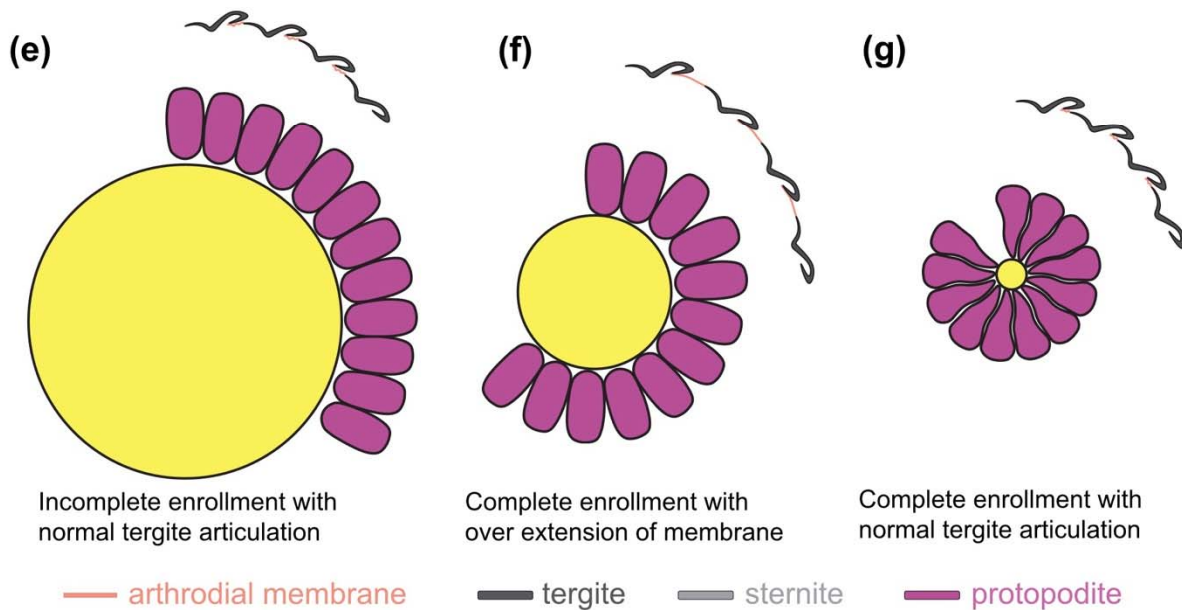

410  
 411

412 **Figure 6. Functional morphology of trilobite enrollment.** (a – d), Hypothesized muscle  
413 attachment in trilobites with contraction indicated by arrow heads. (a) Prone position. (b) Prone  
414 position showing contraction along the VLM and DVP to enroll. (c) Enrolled position with  
415 corrugation sternites dipping anteriorly and extended tenuous bars. (d) Enrolled position showing  
416 contraction of DLM and DVA to extend the body. (e – g) Diagram showing impact of  
417 protopodite morphology on complete and tight enrollment. (e) Oval protopodites restrict  
418 complete enrollment under normal tergite extension. (f) Oval protopodites with maximum  
419 contraction of the ventral edge cause excessive dorsal extension, exposing the arthrodistal  
420 membrane. (g) Wedge-shaped protopodites based on MCZ:IP:104956 facilitate complete and  
421 tight enrollment without over extension of dorsal arthrodistal membrane.  
422  
423

#### 424 **Acknowledgements**

425 We thank Adam Baldinger and Jessica Cundiff (Museum of Comparative Zoology, Cambridge,  
426 USA) for facilitating access to specimens.  
427  
428

#### 429 **References**

- 430 Ballerio, A., and Grebennikov, V., 2016, Rolling into a ball: phylogeny of the Ceratocanthinae  
431 (Coleoptera: Hybosoridae) inferred from adult morphology and origin of a unique body  
432 enrollment coaptation in terrestrial arthropods: *Arthropod Systematics & Phylogeny*, v.  
433 74, p. 23–52, doi:10.3897/asp.74.e31837.
- 434 Beecher, C.E., 1902, The ventral integument of trilobites: *American Journal of Science*, v. s4-13,  
435 p. 165–174, doi:10.2475/ajs.s4-13.75.165.
- 436 Bicknell, R.D.C., Holmes, J.D., Edgecombe, G.D., Losso, S.R., Ortega-Hernández, J., Wroe, S.,  
437 and Paterson, J.R., 2021, Biomechanical analyses of Cambrian euarthropod limbs reveal  
438 their effectiveness in mastication and durophagy: *Proceedings of the Royal Society B:*  
439 *Biological Sciences*, v. 288, p. 20202075.
- 440 Bicknell, R.D.C., Ledogar, J.A., Wroe, S., Gutzler, B.C., Watson, W.H., and Paterson, J.R.,  
441 2018, Computational biomechanical analyses demonstrate similar shell-crushing abilities  
442 in modern and ancient arthropods: *Proceedings of the Royal Society B: Biological*  
443 *Sciences*, v. 285, p. 20181935, doi:10.1098/rspb.2018.1935.
- 444 Boxshall, G.A., 2004, The evolution of arthropod limbs: *Biological Reviews*, v. 79, p. 253–300,  
445 doi:10.1017/S1464793103006274.
- 446 Brökeland, W., Wägele, J.-W., and Bruce, N.L., 2001, *Paravireia holdichi* n. sp., an enigmatic  
447 isopod crustacean from the Canary Islands with affinities to species from New Zealand:  
448 *Org. Divers. Evol.*,
- 449 Bruton, D.L., and Haas, W., 1999, The anatomy and functional morphology of Phacops  
450 (Trilobita) from the Hunsrück Slate (Devonian): *Palaeontographica Abteilung A*, v. 253,  
451 p. 29–75, doi:10.1127/pala/253/1999/29.



- 452 Chen, X., Ortega-Hernández, J., Wolfe, J.M., Zhai, D., Hou, X., Chen, A., Mai, H., and Liu, Y.,  
453 2019, The appendicular morphology of *Sinoburius lunaris* and the evolution of the  
454 artiopodan clade Xandarellida (Euarthropoda, early Cambrian) from South China: BMC  
455 Evolutionary Biology, v. 19, p. 165, doi:10.1186/s12862-019-1491-3.
- 456 Chipman, A.D., and Drage, H.B., 2023, Trilobites in rock enrol: a comment on ‘Developmental  
457 and functional controls on enrolment in an ancient, extinct arthropod’ by Esteve and  
458 Hughes (2023): Proceedings of the Royal Society B: Biological Sciences, v. 290, p.  
459 20231547, doi:10.1098/rspb.2023.1547.
- 460 Cisne, J.L., 1981, *Triarthrus eatoni* (Trilobita): Anatomy of its exoskeletal, skeletomuscular,  
461 and digestive systems: Palaeontographica Americana, v. 9, p. 99–142.
- 462 DeKay, J.E., 1824, Observations on the structure of trilobites, and description of an apparently  
463 new genus. With notes on the geology of Trenton Falls: Annals of The Lyceum of  
464 Natural History of New York, v. 1, p. 174–189.
- 465 Edgecombe, G.D., and Sherwin, L., 2001, Early Silurian (Llandovery) trilobites from the Cotton  
466 Formation, near Forbes, New South Wales, Australia: Alcheringa: An Australasian  
467 Journal of Palaeontology, v. 25, p. 87–105, doi:10.1080/03115510108619215.
- 468 Esteve, J., Gutiérrez-Marco, J.C., Rubio, P., and Rábano, I., 2018, Evolution of trilobite  
469 enrolment during the Great Ordovician Biodiversification Event: insights from kinematic  
470 modelling: Lethaia, v. 51, p. 207–217, doi:10.1111/let.12242.
- 471 Esteve, J., Hughes, N.C., and Zamora, S., 2011, Purujosa trilobite assemblage and the evolution  
472 of trilobite enrolment: Geology, v. 39, p. 575–578, doi:10.1130/G31985.1.
- 473 Esteve, J., Hughes, N.C., and Zamora, S., 2013, Thoracic structure and enrolment style in middle  
474 Cambrian Eccaparadoxides pradoanus presages caudalization of the derived trilobite  
475 trunk: Palaeontology, v. 56, p. 589–601, doi:10.1111/pala.12004.
- 476 Esteve, J., Rubio, P., Zamora, S., and Rahman, I.A., 2017, Modelling enrolment in Cambrian  
477 trilobites: Palaeontology, v. 60, p. 423–432, doi:10.1111/pala.12294.
- 478 Hall, J., 1838, Descriptions of two species of trilobites belonging to the genus Paradoxides:  
479 Journal of Science, v. 33, p. 199–202.
- 480 Hannibal, J.T., and Feldmann, R.M., 1981, Systematics and Functional Morphology of  
481 Oniscomorph Millipedes (Arthropoda: Diplopoda) from the Carboniferous of North  
482 America: Journal of Paleontology, v. 55, p. 730–746.
- 483 Hegna, T.A., 2009, The function of forks: Isotelus-type hypostomes and trilobite feeding:  
484 Lethaia, doi:10.1111/j.1502-3931.2009.00204.x.
- 485 Holmes, J.D., Paterson, J.R., and García-Bellido, D.C., 2020, The trilobite *Redlichia* from the  
486 lower Cambrian Emu Bay Shale Konservat-Lagerstätte of South Australia: systematics,

- 487 ontogeny and soft-part anatomy: *Journal of Systematic Palaeontology*, v. 18, p. 295–334,  
488 doi:10.1080/14772019.2019.1605411.
- 489 Hou, X., Clarkson, E.N.K., Yang, J., Zhang, X., Wu, G., and Yuan, Z., 2008, Appendages of  
490 early Cambrian Eoredlichia (Trilobita) from the Chengjiang biota, Yunnan, China: *Earth  
491 and Environmental Science Transactions of the Royal Society of Edinburgh*, v. 99, p.  
492 213–223, doi:10.1017/S1755691009008093.
- 493 Hou, J., Hughes, N.C., and Hopkins, M.J., 2021, The trilobite upper limb branch is a well-  
494 developed gill: *Science Advances*, v. 7, p. 1–8, doi:10.1126/sciadv.abe7377.
- 495 Hupe, P., 1953, Classe de Trilobites, in *Traité de Paléontologie*, Paris, Masson, v. III, p. 44–246.
- 496 Hyžný, M., and Dávid, A., 2017, A remarkably well-preserved terrestrial isopod (Peracarida:  
497 Isopoda: Armadillidiidae) from the upper Oligocene of Hungary, with remarks on the  
498 oniscidean taphonomy: *Palaeontologia Electronica*, doi:10.26879/615.
- 499 Köiuhler, H.-R., and Alberti, G., 1990, Morphology of the mandibles in the millipedes  
500 (Diplopoda, Arthropoda): *Zoologica Scripta*, v. 19, p. 195–202, doi:10.1111/j.1463-  
501 6409.1990.tb00255.x.
- 502 Linnaeus, C., 1747, *Wästgöta-Resa, på Riksen höglofige ständers befallning förrättad år 1746.*  
503 *Med anmärkningar uti oecommien, naturkunnogheten, antiquiteter, inwånares seder och*  
504 *lefnads-sätt.: Stockholm, Lars Salvius.*
- 505 Losso, S.R., and Ortega-Hernández, J., 2022, Claspers in the mid-Cambrian *Olenoides serratus*  
506 indicate horseshoe crab-like mating in trilobites: *Geology*, v. 50, p. 897–901,  
507 doi:10.1130/G49872.1.
- 508 Losso, S.R., Thines, J.E., and Ortega-Hernández, J., 2023, Taphonomy of non-biomineralized  
509 trilobite tissues preserved as calcite casts from the Ordovician Walcott-Rust Quarry,  
510 USA: *Communications Earth & Environment*, v. 4, doi:doi.org/10.1038/s43247-023-  
511 00981-5.
- 512 Manton, S.M., 1961, The evolution of arthropodan locomotory mechanisms. Part 7. Functional  
513 requirements and body design in Colobognatha (Diplopoda), together with a comparative  
514 account of the diplopod burrowing techniques, trunk musculature and segmentation:  
515 *Journal of the Linnean Society of London, Zoology*, v. 44, p. 383–462,  
516 doi:10.1111/j.1096-3642.1961.tb01622.x.
- 517 Mayers, B., Aria, C., and Caron, J., 2019, Three new naraoid species from the Burgess Shale,  
518 with a morphometric and phylogenetic reinvestigation of Naraoidae (X. Zhang, Ed.):  
519 *Palaeontology*, v. 62, p. 19–50, doi:10.1111/pala.12383.
- 520 Mickleborough, J., 1883, Locomotory appendages of trilobites: *Cincinnati Society of Natural  
521 History*, p. 200–206.

- 522 Müller, K.J., and Walossek, D., 1987, Morphology, ontogeny, and life habit of *Agnostus*  
523 *pisiformis* from the Upper Cambrian of Sweden: Oslo, Universitetsforlaget, Fossils and  
524 strata no. 19, 124 p.
- 525 Ortega-Hernández, J., Azizi, A., Hearing, T.W., Harvey, T.H.P., Edgecombe, G.D., Hafid, A.,  
526 and El Hariri, K., 2017, A xandarellid artiopodan from Morocco – a middle Cambrian  
527 link between soft-bodied euarthropod communities in North Africa and South China:  
528 Scientific Reports, v. 7, doi:10.1038/srep42616.
- 529 Ortega-Hernández, J., and Brena, C., 2012, Ancestral patterning of tergite formation in a  
530 centipede suggests derived mode of trunk segmentation in trilobites (P. K. Dearden, Ed.):  
531 PLoS ONE, v. 7, p. e52623, doi:10.1371/journal.pone.0052623.
- 532 Ortega-Hernández, J., Esteve, J., and Butterfield, N.J., 2013, Humble origins for a successful  
533 strategy: complete enrolment in early Cambrian olenellid trilobites: Biology Letters, v. 9,  
534 p. 20130679–20130679, doi:10.1098/rsbl.2013.0679.
- 535 Ramsköld, L., and Edgecombe, G.D., 1996, Trilobite appendage structure — *Eoredlichia*  
536 reconsidered: Alcheringa: An Australasian Journal of Palaeontology, v. 20, p. 269–276,  
537 doi:10.1080/03115519608619471.
- 538 Raymond, P.E., 1920, The Appendages, Anatomy, and Relationships of Trilobites: Memoirs of  
539 the Connecticut Academy of Arts and Sciences, v. 7.
- 540 Schmidt, M., Hou, X., Zhai, D., Mai, H., Belojević, J., Chen, X., Melzer, R.R., Ortega-  
541 Hernández, J., and Liu, Y., 2022, Before trilobite legs: *Pygmaclypeatus daziensis*  
542 reconsidered and the ancestral appendicular organization of Cambrian artiopods:  
543 Philosophical Transactions of the Royal Society B: Biological Sciences, v. 377, p.  
544 20210030, doi:https://doi.org/10.1098/rstb.2021.0030.
- 545 Schmidt, M., Hou, X., Zhai, D., Mai, H., Belojević, J., Chen, X., Melzer, R.R., Ortega-  
546 Hernández, J., and Liu, Y., 2021, Before trilobite legs: *Pygmaclypeatus daziensis*  
547 reconsidered and the ancestral appendicular organization of Cambrian artiopods: preprint,  
548 doi:10.1101/2021.08.18.456779.
- 549 Shear, W., Jones, T., and Wesener, T., 2011, Glomerin and homoglomerin from the North  
550 American pill millipede *Onomeris sinuata* (Loomis, 1943) (Diplopoda, Pentazonia,  
551 Glomeridae): International Journal of Myriapodology, v. 4, p. 1–10,  
552 doi:10.3897/ijm.4.1105.
- 553 Siveter, D.J., Fortey, R.A., Briggs, D.E.G., Siveter, D.J., and Sutton, M.D., 2021, The first  
554 Silurian trilobite with three dimensionally preserved soft parts reveals novel appendage  
555 morphology (X. Zhang, Ed.): Papers in Palaeontology, p. spp2.1401,  
556 doi:10.1002/spp2.1401.
- 557 Stein, M., Budd, G.E., Peel, J.S., and Harper, D.A., 2013, *Arthroaspis* n. gen., a common  
558 element of the Sirius Passet Lagerstätte (Cambrian, North Greenland), sheds light on

- 559 trilobite ancestry: *BMC Evolutionary Biology*, v. 13, p. 99, doi:10.1186/1471-2148-13-  
560 99.
- 561 Størmer, L., 1939, Studies on trilobite morphology. Part I: The thoracic appendages and their  
562 phylogenetic significance: *Norsk Geologisk Tidsskrift*, v. 19, p. 143–274.
- 563 Suárez, M.G., and Esteve, J., 2021, Morphological diversity and disparity in trilobite cephalia and  
564 the evolution of trilobite enrolment throughout the Palaeozoic: *Lethaia*, v. 54, p. 752–  
565 761, doi:10.1111/let.12437.
- 566 Superina, M., and Loughry, W.J., 2012, Life on the Half-Shell: Consequences of a Carapace in  
567 the Evolution of Armadillos (Xenarthra: Cingulata): *Journal of Mammalian Evolution*, v.  
568 19, p. 217–224, doi:10.1007/s10914-011-9166-x.
- 569 Walcott, C.D., 1881, The trilobite: new and old evidence relating to its organization: *Bulletin of*  
570 *the Museum of Comparative Zoology at Harvard College*, v. 8, p. 190–242.
- 571 Whittington, H.B., 1993, Anatomy of the Ordovician trilobite *Placoparia*: *Philosophical*  
572 *Transactions of the Royal Society of London. Series B: Biological Sciences*, v. 339, p.  
573 109–118, doi:10.1098/rstb.1993.0008.
- 574 Whittington, H.B., 1975, Trilobites with appendages from the middle Cambrian, Burgess Shale,  
575 British Columbia: *Fossils and Strata*, p. 97–135.
- 576 Whittington, H.B., and Almond, J.E., 1987, Appendages and Habits of the Upper Ordovician  
577 Trilobite *Triarthrus eatoni*: *Philosophical Transactions of the Royal Society of London*, v.  
578 317, p. 1–46.
- 579 Whittington, H.B., Moore, R.C., Geological Society of America, and Paleontological Society  
580 (Eds.), 1997, *Treatise on Invertebrate Paleontology O: Lawrence, Kans, Univ. of Kansas*  
581 *Pr, Treatise on invertebrate paleontology Arthropoda 1. Trilobita Founder: Raymond C.*  
582 *Moore. Prepared under the sponsorship of The Geological Society of America, Inc., The*  
583 *Paleontological Society ... ; Pt. O Vol. 1, 530 p.*
- 584 Yochelson, E.L., 1998, *Charles Doolittle Walcott, Paleontologist: Kent, Ohio, The Kent State*  
585 *University Press.*
- 586 Zeng, H., Zhao, F., Yin, Z., and Zhu, M., 2017, Appendages of an early Cambrian metadoxidid  
587 trilobite from Yunnan, SW China support mandibulate affinities of trilobites and  
588 arthropods: *Geological Magazine*, v. 154, p. 1306–1328,  
589 doi:10.1017/S0016756817000279.
- 590 Zhang, X.-L., Shu, D.-G., and Erwin, D.H., 2007, Cambrian naraoiids (Arthropoda):  
591 morphology, ontogeny, systematics, and evolutionary relationships: *Journal of*  
592 *Paleontology*, v. 81, p. 1–52, doi:10.1666/06-082.1.

593

594 **Supplemental Figures**

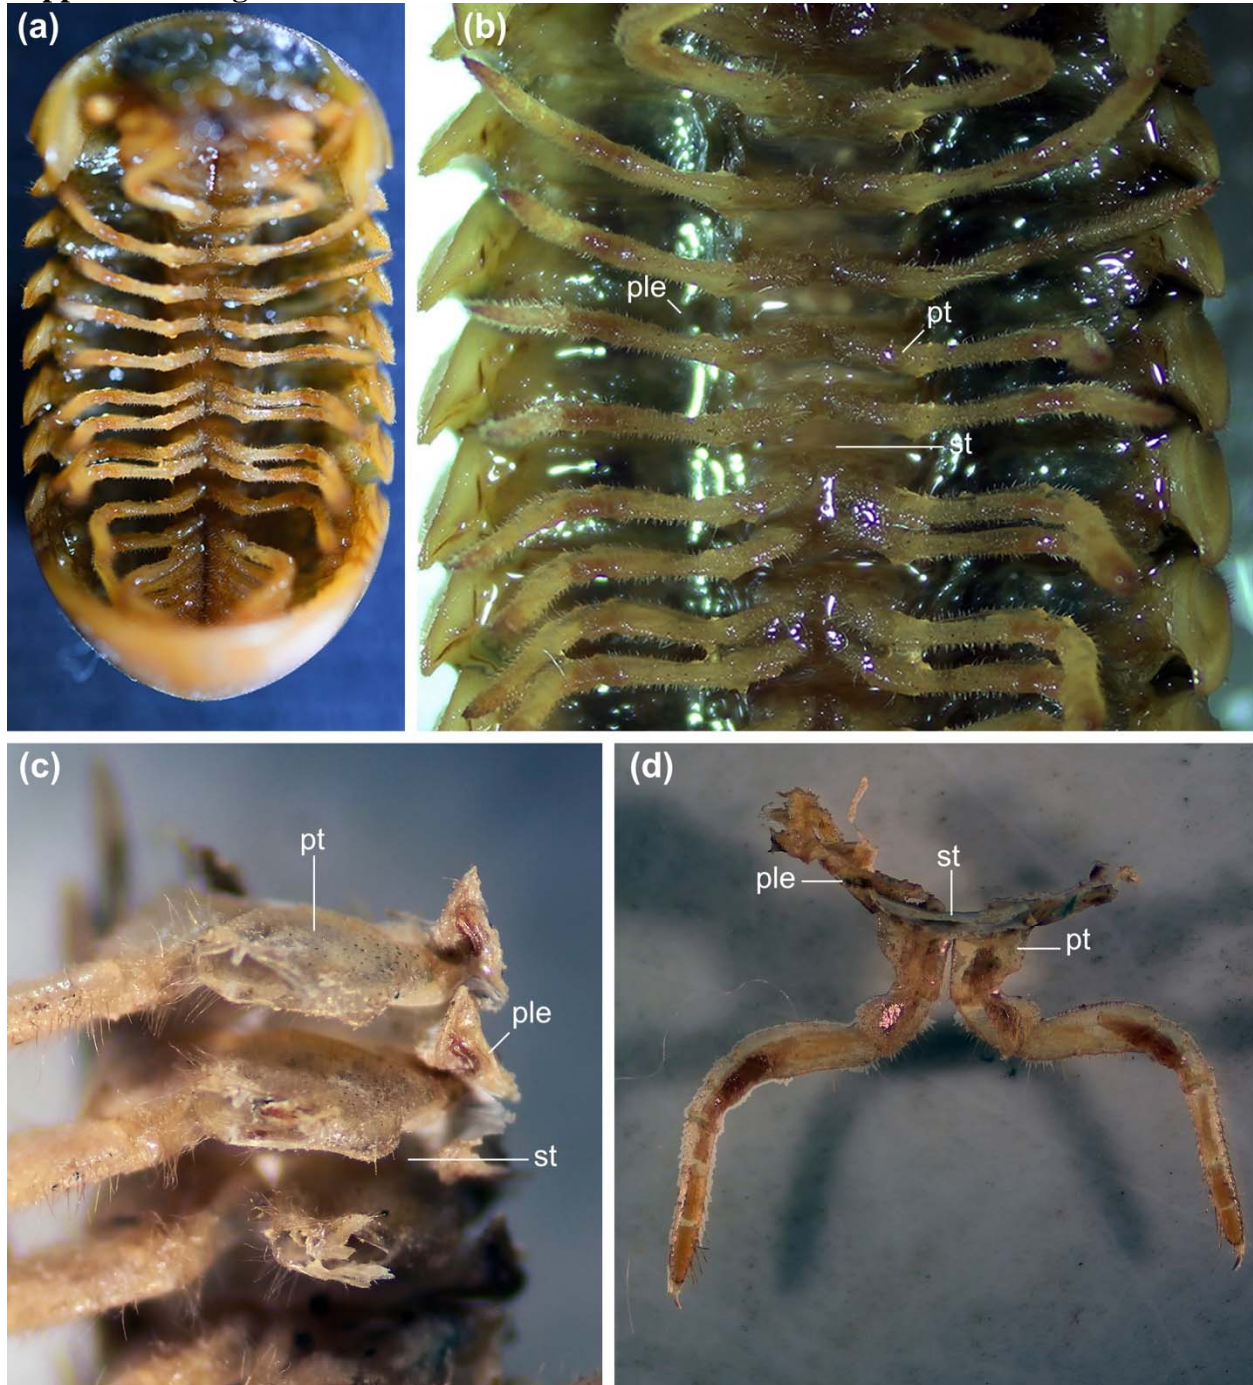

595  
596 **Figure 1. Dissection of terrestrial glomerid millipede.** (a) Ventral view of complete specimen  
597 showing medial appendage attachment. (b) Ventral view of appendages. (c) Dissection of  
598 sternites and appendages with endopodites of right side removed. (d) Anterior view of dissected  
599 appendage pair with sternite and medial part of pleurite. Abbreviations: ple, pleurite; pt,  
600 protopodite; st, sternite.

601  
602  
603

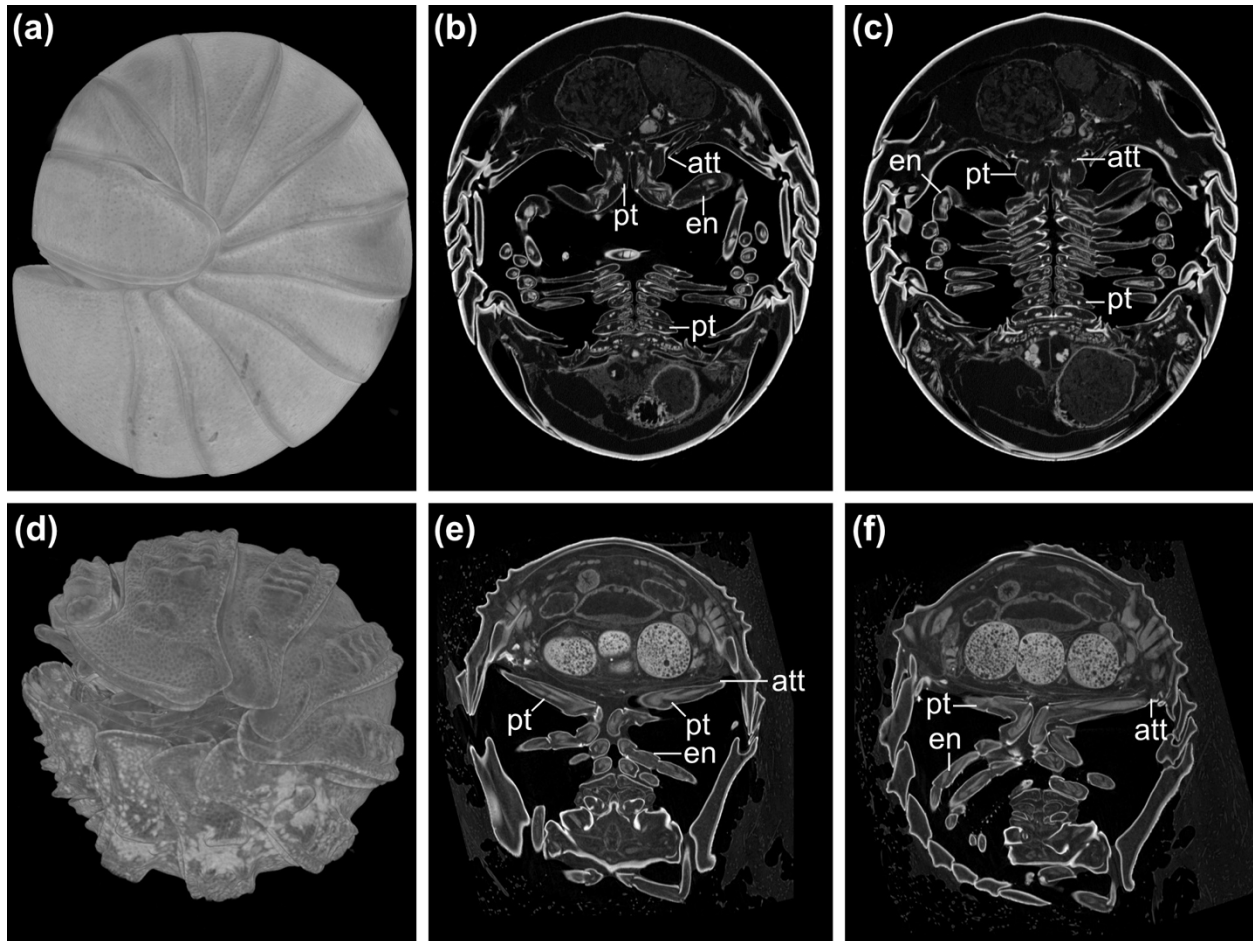

604  
605  
606  
607  
608  
609  
610  
611  
612

**Figure 2. Comparison of appendage attachment of glomerid millipede and terrestrial isopod.** (a – c) Micro-CT of fully enrolled glomerid millipede (MCZ:IZ:165554). (a) Three-dimensional volume rendering. (b) Tomographic slice showing medial appendage attachment. (c) Tomographic slice showing appendage orientation during enrollment. (d – f) Micro-CT of fully enrolled terrestrial isopod (MCZ:IZ:90105). (d) Three-dimensional volume rendering. (e) Tomographic slice showing lateral appendage attachment. (f) Tomographic slice showing appendage orientation during enrollment. Abbreviations: att, attachment of appendage to body wall; en, endopodite; pt, protopodite.
